# Supplementary material for: Dimethyl sulfide (DMS) climatologies, fluxes, and trends – Part B: Sea-air fluxes
Source: Copernicus journal article supplement (doi:10.5194/egusphere-2024-175), 2024-02-27
Supplement: Supplementary file 1 [file egusphere-2024-175-supplement.pdf]

# Dimethyl sulfide (DMS) climatologies, fluxes, and trends - Part B: Sea-air fluxes

## Supplementary Tables :

**Table S1:** Monthly Binned in situ Flux data at 1°×1° resolution.

| Month | Year | Latitude | Longitude | In Situ DMS Flux ( $\mu\text{mol m}^{-2} \text{d}^{-1}$ ) | References               |
|-------|------|----------|-----------|-----------------------------------------------------------|--------------------------|
| 9     | 1991 | 0        | 160       | 1.6                                                       | (Marandino et al., 2007) |
| 9     | 1991 | 5        | 126       | 0.8                                                       |                          |
| 9     | 1991 | 13       | 160       | 0.6                                                       | (Marandino et al., 2008) |
| 9     | 1991 | 17       | 130       | 3                                                         |                          |
| 9     | 1991 | 20       | 127       | 1                                                         | (Marandino et al., 2009) |
| 9     | 1991 | 27       | 136       | 2.2                                                       |                          |
| 9     | 1991 | 28       | 147       | 0.7                                                       | (Yang et al., 2011)      |
| 9     | 1991 | 29       | 147       | 2.4                                                       |                          |
| 10    | 1991 | 20       | -155      | 0.8                                                       | (Bell et al., 2015)      |
| 2     | 1994 | 16       | 146       | 1.4                                                       |                          |
| 2     | 1994 | 136      | 147       | 1.5                                                       | (Blomquist et al., 2017) |
| 3     | 1994 | 1        | 146       | 1.9                                                       |                          |
| 11    | 1995 | -54      | 159       | 0.4                                                       | (Omori et al., 2017)     |
| 11    | 1995 | -53      | 138       | 1.3                                                       |                          |
| 11    | 1995 | -48      | 137       | 0.6                                                       | (Smith et al., 2018)     |
| 11    | 1995 | -47      | 146       | 1.2                                                       |                          |
| 11    | 1995 | -44      | 151       | 2.6                                                       | (Shon et al., 2001)      |
| 11    | 1995 | -41      | 144       | 6.6                                                       |                          |
| 12    | 1995 | -51      | 157       | 3.5                                                       | (Leck and Persson, 1996) |
| 12    | 1995 | -50      | 148       | 2.8                                                       |                          |
| 12    | 1995 | -47      | 151       | 2.6                                                       | (Sharma et al., 1999)    |
| 12    | 1995 | -46      | 146       | 2.2                                                       |                          |
| 12    | 1995 | -46      | 149       | 2.2                                                       | (Land et al., 2014)      |
| 12    | 1995 | -45      | 144       | 2.75                                                      |                          |
| 12    | 1995 | -42      | 142       | 2.4                                                       |                          |
| 12    | 1995 | -41      | 139       | 0.9                                                       |                          |

|    |      |    |      |          |
|----|------|----|------|----------|
| 6  | 2000 | 41 | -71  | 6.2      |
| 11 | 2003 | -8 | -109 | 11.4     |
| 11 | 2003 | -8 | -108 | 8.72     |
| 11 | 2003 | -8 | -107 | 9.08     |
| 11 | 2003 | -8 | -106 | 6.6      |
| 11 | 2003 | -8 | -105 | 7.85     |
| 11 | 2003 | -8 | -104 | 6.54     |
| 11 | 2003 | -8 | -103 | 9        |
| 11 | 2003 | -8 | -102 | 8.08     |
| 11 | 2003 | -8 | -101 | 7.675    |
| 11 | 2003 | -8 | -100 | 6.1      |
| 11 | 2003 | -8 | -99  | 7.94     |
| 11 | 2003 | -8 | -98  | 8.125    |
| 11 | 2003 | -8 | -97  | 6.64     |
| 11 | 2003 | -8 | -96  | 7.275    |
| 11 | 2003 | -8 | -95  | 6.64     |
| 11 | 2003 | -7 | -95  | 8.5      |
| 11 | 2003 | -6 | -95  | 6.22     |
| 11 | 2003 | -5 | -95  | 4.2      |
| 11 | 2003 | -4 | -95  | 5.35     |
| 11 | 2003 | -3 | -110 | 5.5      |
| 11 | 2003 | -3 | -95  | 7.233333 |
| 11 | 2003 | -2 | -110 | 3.716667 |
| 11 | 2003 | -2 | -95  | 2.7625   |
| 11 | 2003 | -1 | -110 | 2.4      |
| 11 | 2003 | -1 | -95  | 1.1      |
| 11 | 2003 | 0  | -110 | 2.1      |
| 11 | 2003 | 0  | -100 | 7.1      |
| 11 | 2003 | 0  | -95  | 7.084615 |
| 11 | 2003 | 1  | -95  | 8.236364 |
| 11 | 2003 | 1  | -94  | 6.1      |
| 11 | 2003 | 1  | -93  | 4.25     |
| 11 | 2003 | 1  | -92  | 4.9      |
| 11 | 2003 | 2  | -110 | 9.5      |
| 11 | 2003 | 2  | -95  | 9.7625   |
| 11 | 2003 | 2  | -92  | 5.25     |

|    |      |    |      |          |
|----|------|----|------|----------|
| 11 | 2003 | 2  | -91  | 6.975    |
| 11 | 2003 | 2  | -90  | 7.25     |
| 11 | 2003 | 3  | -110 | 12.5     |
| 11 | 2003 | 3  | -95  | 7.844444 |
| 11 | 2003 | 3  | -90  | 10.35    |
| 11 | 2003 | 3  | -89  | 13.925   |
| 11 | 2003 | 3  | -88  | 15.6     |
| 11 | 2003 | 4  | -110 | 16.64    |
| 11 | 2003 | 4  | -95  | 6.3875   |
| 11 | 2003 | 4  | -88  | 16.65    |
| 11 | 2003 | 4  | -87  | 9.72     |
| 11 | 2003 | 4  | -86  | 7.35     |
| 11 | 2003 | 5  | -110 | 5.68     |
| 11 | 2003 | 5  | -95  | 3.52     |
| 11 | 2003 | 7  | -95  | 4.566667 |
| 11 | 2003 | 8  | -110 | 2.25     |
| 11 | 2003 | 8  | -109 | 2.95     |
| 11 | 2003 | 8  | -107 | 4.2      |
| 11 | 2003 | 8  | -106 | 1.7      |
| 11 | 2003 | 8  | -96  | 3.9      |
| 11 | 2003 | 8  | -95  | 2.15     |
| 5  | 2004 | 5  | 168  | 1.105333 |
| 5  | 2004 | 5  | 169  | 1.66     |
| 5  | 2004 | 6  | 165  | 3.913333 |
| 5  | 2004 | 6  | 166  | 9.78     |
| 5  | 2004 | 7  | 161  | 3.083333 |
| 5  | 2004 | 7  | 162  | 3.925    |
| 5  | 2004 | 7  | 163  | 4.835    |
| 5  | 2004 | 8  | 159  | 2.4425   |
| 5  | 2004 | 8  | 160  | 2.4425   |
| 5  | 2004 | 9  | 155  | 3.36     |
| 5  | 2004 | 9  | 156  | 3.432857 |
| 5  | 2004 | 9  | 157  | 2.06     |
| 5  | 2004 | 10 | 155  | 4.705    |
| 5  | 2004 | 12 | 147  | 2.535    |
| 5  | 2004 | 12 | 148  | 1.43     |

|   |      |    |      |          |
|---|------|----|------|----------|
| 6 | 2004 | 0  | -166 | 9.3      |
| 6 | 2004 | 0  | -165 | 8.403333 |
| 6 | 2004 | 1  | -167 | 8.67     |
| 6 | 2004 | 1  | -165 | 6.3325   |
| 6 | 2004 | 1  | -164 | 10.33    |
| 6 | 2004 | 2  | -164 | 8.845    |
| 6 | 2004 | 2  | -163 | 10.495   |
| 6 | 2004 | 4  | -162 | 8.215    |
| 6 | 2004 | 4  | -161 | 6.26     |
| 6 | 2004 | 4  | -156 | 3.64     |
| 6 | 2004 | 5  | -160 | 8.005    |
| 6 | 2004 | 6  | -160 | 10.6     |
| 6 | 2004 | 7  | -157 | 6.67     |
| 6 | 2004 | 8  | -158 | 5.31     |
| 6 | 2004 | 21 | -156 | 6.05     |
| 6 | 2004 | 22 | -157 | 3.85     |
| 6 | 2004 | 23 | -155 | 2.89     |
| 6 | 2004 | 25 | -154 | 4.605    |
| 6 | 2004 | 26 | -155 | 4.675    |
| 6 | 2004 | 28 | -154 | 2.92     |
| 6 | 2004 | 45 | -144 | 2.19     |
| 7 | 2004 | 29 | -75  | 1.7      |
| 7 | 2004 | 29 | -74  | 4.42     |
| 7 | 2004 | 29 | -73  | 5.1      |
| 7 | 2004 | 29 | -64  | 7.236    |
| 7 | 2004 | 29 | -63  | 6.022222 |
| 7 | 2004 | 30 | -73  | 5.433333 |
| 7 | 2004 | 30 | -72  | 4.48     |
| 7 | 2004 | 30 | -71  | 5.8      |
| 7 | 2004 | 30 | -70  | 6.95     |
| 7 | 2004 | 30 | -66  | 6.4      |
| 7 | 2004 | 30 | -65  | 6.465517 |
| 7 | 2004 | 30 | -64  | 6.2      |
| 7 | 2004 | 31 | -69  | 5.5      |
| 7 | 2004 | 31 | -66  | 7.030303 |
| 7 | 2004 | 31 | -65  | 5.696429 |

|   |      |     |      |          |
|---|------|-----|------|----------|
| 8 | 2004 | 28  | -71  | 7.775    |
| 8 | 2004 | 28  | -70  | 6.3      |
| 8 | 2004 | 28  | -69  | 9.5      |
| 8 | 2004 | 29  | -69  | 7.35     |
| 8 | 2004 | 29  | -68  | 17.05    |
| 8 | 2004 | 29  | -67  | 4.45     |
| 8 | 2004 | 29  | -66  | 5.85     |
| 8 | 2004 | 29  | -65  | 4.5      |
| 8 | 2004 | 29  | -64  | 2.8      |
| 8 | 2004 | 30  | -60  | 6.2      |
| 1 | 2006 | -35 | -103 | 5.8      |
| 1 | 2006 | -34 | -103 | 6.505    |
| 1 | 2006 | -33 | -103 | 4.35     |
| 1 | 2006 | -28 | -103 | 1.48     |
| 1 | 2006 | -27 | -103 | 1.135    |
| 1 | 2006 | -26 | -103 | 1.17     |
| 1 | 2006 | -24 | -103 | 3.165    |
| 1 | 2006 | -23 | -103 | 2.46     |
| 1 | 2006 | -19 | -105 | 8.08     |
| 1 | 2006 | -18 | -105 | 5.48     |
| 1 | 2006 | -16 | -106 | 43.4     |
| 1 | 2006 | -15 | -107 | 36.15    |
| 1 | 2006 | -12 | -108 | 37.55    |
| 1 | 2006 | -11 | -109 | 15.1     |
| 1 | 2006 | -11 | -108 | 19.4     |
| 1 | 2006 | -10 | -109 | 7.52     |
| 1 | 2006 | -9  | -110 | 6.48     |
| 1 | 2006 | -7  | -110 | 5.88     |
| 1 | 2006 | -6  | -110 | 12.3     |
| 1 | 2006 | -4  | -110 | 11.4     |
| 1 | 2006 | -3  | -110 | 7.925    |
| 1 | 2006 | -2  | -110 | 7.385    |
| 1 | 2006 | -1  | -110 | 8.82     |
| 6 | 2007 | 43  | -18  | 4.516364 |
| 6 | 2007 | 44  | -18  | 3.2      |
| 7 | 2007 | 42  | -18  | 1.657576 |

|   |      |    |     |          |
|---|------|----|-----|----------|
| 7 | 2007 | 42 | -17 | 1.738462 |
| 7 | 2007 | 42 | -16 | 1.314286 |
| 7 | 2007 | 43 | -65 | 9.643333 |
| 7 | 2007 | 43 | -64 | 3.18     |
| 7 | 2007 | 43 | -18 | 2.565    |
| 7 | 2007 | 43 | -17 | 1        |
| 7 | 2007 | 43 | -16 | 2.356452 |
| 7 | 2007 | 44 | -63 | 0.475    |
| 7 | 2007 | 44 | -62 | 2.29     |
| 7 | 2007 | 44 | -61 | 2.855    |
| 7 | 2007 | 44 | -60 | 3.345    |
| 7 | 2007 | 44 | -59 | 0.555    |
| 7 | 2007 | 44 | -18 | 3.35     |
| 7 | 2007 | 44 | -16 | 3.6      |
| 7 | 2007 | 44 | -15 | 1.6      |
| 7 | 2007 | 45 | -59 | 3.42925  |
| 7 | 2007 | 45 | -58 | 5.342    |
| 7 | 2007 | 45 | -57 | 0.698    |
| 7 | 2007 | 45 | -56 | 0.785333 |
| 7 | 2007 | 45 | -20 | 5.2      |
| 7 | 2007 | 46 | -56 | 1.0135   |
| 7 | 2007 | 46 | -55 | 2.39     |
| 7 | 2007 | 46 | -54 | 4.677143 |
| 7 | 2007 | 46 | -53 | 2.85     |
| 7 | 2007 | 47 | -52 | 1.77     |
| 7 | 2007 | 47 | -51 | 2.32     |
| 7 | 2007 | 47 | -15 | 0.2      |
| 7 | 2007 | 48 | -51 | 2.756667 |
| 7 | 2007 | 48 | -50 | 4.53     |
| 7 | 2007 | 48 | -49 | 3.62     |
| 7 | 2007 | 49 | -49 | 7.515833 |
| 7 | 2007 | 49 | -48 | 11.24333 |
| 7 | 2007 | 50 | -48 | 13.4     |
| 7 | 2007 | 50 | -47 | 16.16    |
| 7 | 2007 | 50 | -46 | 9.953333 |
| 7 | 2007 | 51 | -46 | 12.38333 |

|   |      |     |     |          |
|---|------|-----|-----|----------|
| 7 | 2007 | 51  | -45 | 7.863333 |
| 7 | 2007 | 51  | -44 | 4.11     |
| 7 | 2007 | 52  | -44 | 2.56     |
| 7 | 2007 | 52  | -43 | 4.972857 |
| 7 | 2007 | 52  | -42 | 5.46     |
| 7 | 2007 | 52  | -15 | 15.1     |
| 7 | 2007 | 53  | -42 | 5.613333 |
| 7 | 2007 | 53  | -41 | 17.77    |
| 7 | 2007 | 53  | -40 | 9.71     |
| 7 | 2007 | 53  | -15 | 19.86667 |
| 7 | 2007 | 53  | -14 | 33.4     |
| 7 | 2007 | 54  | -14 | 19.2     |
| 7 | 2007 | 54  | -13 | 19.88571 |
| 7 | 2007 | 54  | -12 | 8.866667 |
| 7 | 2007 | 55  | -12 | 18.4     |
| 7 | 2007 | 55  | -11 | 16.05    |
| 7 | 2007 | 55  | -10 | 10.36667 |
| 7 | 2007 | 55  | -9  | 6.5      |
| 3 | 2008 | -54 | -37 | 1.484615 |
| 3 | 2008 | -53 | -37 | 0.7      |
| 3 | 2008 | -52 | -38 | 2.35     |
| 3 | 2008 | -52 | -37 | 2.15     |
| 3 | 2008 | -51 | -39 | 2.630435 |
| 3 | 2008 | -51 | -38 | 4.568376 |
| 3 | 2008 | -51 | -37 | 2.811864 |
| 3 | 2008 | -51 | -36 | 0.6      |
| 3 | 2008 | -50 | -39 | 5.26     |
| 3 | 2008 | -50 | -38 | 3.65     |
| 3 | 2008 | -50 | -37 | 2.933333 |
| 4 | 2008 | -52 | -37 | 1.7      |
| 4 | 2008 | -51 | -38 | 0.7      |
| 4 | 2008 | -51 | -37 | 1.326667 |
| 4 | 2008 | -50 | -40 | 2.9      |
| 4 | 2008 | -46 | -46 | 1.2      |
| 4 | 2008 | -45 | -47 | 1.55     |
| 4 | 2008 | -45 | -46 | 2.175    |

|    |      |     |     |          |
|----|------|-----|-----|----------|
| 10 | 2008 | -20 | -86 | 2.873684 |
| 10 | 2008 | -20 | -85 | 4.696154 |
| 10 | 2008 | -20 | -84 | 7.38     |
| 10 | 2008 | -20 | -83 | 8.42     |
| 10 | 2008 | -20 | -82 | 7.86     |
| 10 | 2008 | -20 | -81 | 8.86     |
| 10 | 2008 | -20 | -80 | 10.08    |
| 10 | 2008 | -20 | -79 | 5.116667 |
| 10 | 2008 | -20 | -78 | 4.32     |
| 10 | 2008 | -20 | -77 | 3.9      |
| 10 | 2008 | -20 | -76 | 5.64     |
| 10 | 2008 | -20 | -75 | 3.805    |
| 10 | 2008 | -19 | -86 | 8.3      |
| 10 | 2008 | -19 | -85 | 6.175    |
| 10 | 2008 | -18 | -85 | 4.16     |
| 10 | 2008 | -17 | -85 | 4.383333 |
| 10 | 2008 | -16 | -85 | 4.98     |
| 10 | 2008 | -15 | -85 | 2.76     |
| 10 | 2008 | -14 | -85 | 1.92     |
| 10 | 2008 | -13 | -85 | 3.5      |
| 10 | 2008 | -12 | -85 | 5.52     |
| 10 | 2008 | -11 | -85 | 5.366667 |
| 10 | 2008 | -10 | -85 | 6.4      |
| 10 | 2008 | -9  | -85 | 2.9      |
| 10 | 2008 | -8  | -85 | 0.883333 |
| 10 | 2008 | -7  | -85 | 2.9      |
| 10 | 2008 | -7  | -84 | 1.8      |
| 10 | 2008 | -6  | -84 | 2.828571 |
| 10 | 2008 | -5  | -84 | 1.84     |
| 10 | 2008 | -4  | -84 | 1.3      |
| 10 | 2008 | -4  | -83 | 1.725    |
| 10 | 2008 | -3  | -83 | 16.56    |
| 10 | 2008 | -2  | -83 | 14       |
| 10 | 2008 | -1  | -83 | 3.3      |
| 11 | 2008 | -22 | -80 | 3.4      |
| 11 | 2008 | -22 | -74 | 1.92     |



|    |      |     |      |          |
|----|------|-----|------|----------|
| 11 | 2008 | -22 | -72  | 2.9625   |
| 11 | 2008 | -22 | -71  | 0.45     |
| 11 | 2008 | -22 | -70  | 0.6      |
| 11 | 2008 | -21 | -85  | 2.43913  |
| 11 | 2008 | -21 | -84  | 2.844444 |
| 11 | 2008 | -21 | -83  | 3.441667 |
| 11 | 2008 | -21 | -82  | 3.364286 |
| 11 | 2008 | -21 | -81  | 1.933333 |
| 11 | 2008 | -21 | -80  | 2.263636 |
| 11 | 2008 | -21 | -79  | 5.1      |
| 11 | 2008 | -21 | -75  | 3.675    |
| 11 | 2008 | -21 | -74  | 1.8      |
| 11 | 2008 | -20 | -85  | 2.016667 |
| 11 | 2008 | -20 | -84  | 3.495455 |
| 11 | 2008 | -20 | -78  | 5.38     |
| 11 | 2008 | -20 | -77  | 2.62     |
| 11 | 2008 | -20 | -76  | 1.91875  |
| 11 | 2008 | -20 | -75  | 2.773913 |
| 11 | 2008 | -20 | -73  | 2        |
| 11 | 2008 | -20 | -72  | 1.718182 |
| 11 | 2008 | -19 | -84  | 2.155556 |
| 11 | 2008 | -19 | -81  | 1.2      |
| 11 | 2008 | -19 | -80  | 6.1      |
| 11 | 2008 | -19 | -79  | 2.633333 |
| 11 | 2008 | -19 | -76  | 4.1      |
| 11 | 2008 | -19 | -75  | 3.175    |
| 11 | 2008 | -19 | -74  | 0.8      |
| 11 | 2008 | -19 | -73  | 1.02     |
| 11 | 2008 | -19 | -72  | 1.56     |
| 11 | 2008 | -19 | -71  | 1.715385 |
| 12 | 2008 | -21 | -71  | 1.5      |
| 12 | 2008 | -21 | -70  | 0.9      |
| 1  | 2012 | -30 | -107 | 5.2      |
| 1  | 2012 | -23 | -120 | 12.1     |
| 1  | 2012 | -23 | -100 | 6.6      |
| 1  | 2012 | -20 | -100 | 26.1     |

|    |      |     |      |          |
|----|------|-----|------|----------|
| 2  | 2012 | -46 | 173  | 8.749756 |
| 2  | 2012 | -46 | 174  | 9.959917 |
| 2  | 2012 | -45 | 174  | 9.940588 |
| 2  | 2012 | -45 | 175  | 19.82411 |
| 2  | 2012 | -44 | 174  | 19.03833 |
| 2  | 2012 | -44 | 175  | 26.07352 |
| 2  | 2012 | -44 | 176  | 14.77714 |
| 2  | 2012 | -44 | 177  | 21.17849 |
| 2  | 2012 | -44 | 178  | 7.062713 |
| 2  | 2012 | -44 | 179  | 5.921477 |
| 2  | 2012 | -44 | 180  | 9.729116 |
| 2  | 2012 | -44 | 181  | 3.49889  |
| 2  | 2012 | -43 | 175  | 4.986496 |
| 2  | 2012 | -43 | 179  | 5.614133 |
| 2  | 2012 | -43 | 180  | 9.145043 |
| 3  | 2012 | -45 | 175  | 6.297276 |
| 3  | 2012 | -44 | -180 | 7.5      |
| 3  | 2012 | -44 | 173  | 9.406773 |
| 3  | 2012 | -44 | 174  | 11.11755 |
| 3  | 2012 | -44 | 175  | 17.04101 |
| 9  | 2012 | 43  | -133 | 14.8     |
| 9  | 2012 | 47  | -180 | 9.8      |
| 9  | 2012 | 47  | 170  | 7.4      |
| 10 | 2013 | 53  | -49  | 0.258138 |
| 10 | 2013 | 53  | -48  | 0.140438 |
| 10 | 2013 | 53  | -47  | 0.116901 |
| 10 | 2013 | 53  | -46  | 0.274299 |
| 10 | 2013 | 53  | -45  | 0.42615  |
| 10 | 2013 | 53  | -44  | 0.330985 |
| 10 | 2013 | 53  | -43  | 0.186145 |
| 10 | 2013 | 54  | -47  | 0.328994 |
| 10 | 2013 | 54  | -46  | 0.435587 |
| 10 | 2013 | 54  | -45  | 0.529874 |
| 10 | 2013 | 54  | -44  | 0.272545 |
| 10 | 2013 | 55  | -46  | 0.259339 |
| 10 | 2013 | 56  | -46  | 0.152437 |

|    |      |    |     |          |
|----|------|----|-----|----------|
| 10 | 2013 | 57 | -46 | 0.109785 |
| 10 | 2013 | 58 | -46 | 0.292686 |
| 10 | 2013 | 58 | -45 | 0.734069 |
| 10 | 2013 | 59 | -50 | 0.372846 |
| 10 | 2013 | 59 | -45 | 0.369968 |
| 10 | 2013 | 60 | -51 | 0.148186 |
| 10 | 2013 | 61 | -51 | 0.143013 |
| 10 | 2013 | 62 | -52 | 0.116265 |
| 10 | 2013 | 62 | -51 | 0.173884 |
| 10 | 2013 | 63 | -52 | 0.116019 |
| 11 | 2013 | 41 | -65 | 0.790641 |
| 11 | 2013 | 41 | -64 | 0.859507 |
| 11 | 2013 | 41 | -63 | 0.672312 |
| 11 | 2013 | 42 | -64 | 0.778588 |
| 11 | 2013 | 42 | -63 | 0.136175 |
| 11 | 2013 | 43 | -63 | 0.208599 |
| 11 | 2013 | 43 | -62 | 0.119829 |
| 11 | 2013 | 44 | -62 | 0.131688 |
| 11 | 2013 | 44 | -61 | 0.168166 |
| 11 | 2013 | 45 | -61 | 0.12096  |
| 11 | 2013 | 45 | -60 | 0.238417 |
| 11 | 2013 | 46 | -60 | 0.239039 |
| 11 | 2013 | 46 | -59 | 0.20804  |
| 11 | 2013 | 47 | -60 | 0.440808 |
| 11 | 2013 | 47 | -59 | 0.184634 |
| 11 | 2013 | 48 | -60 | 0.305009 |
| 11 | 2013 | 49 | -60 | 0.237817 |
| 11 | 2013 | 49 | -59 | 0.334803 |
| 11 | 2013 | 50 | -58 | 0.289316 |
| 11 | 2013 | 51 | -57 | 0.3235   |
| 11 | 2013 | 52 | -57 | 0.191453 |
| 11 | 2013 | 52 | -56 | 0.188311 |
| 11 | 2013 | 52 | -55 | 0.2374   |
| 11 | 2013 | 52 | -54 | 0.346499 |
| 11 | 2013 | 52 | -53 | 0.411235 |
| 11 | 2013 | 52 | -52 | 0.371889 |

|    |      |    |      |          |
|----|------|----|------|----------|
| 11 | 2013 | 52 | -51  | 0.374102 |
| 11 | 2013 | 52 | -50  | 0.391167 |
| 11 | 2013 | 52 | -49  | 0.357335 |
| 11 | 2013 | 52 | -48  | 0.229348 |
| 11 | 2013 | 52 | -47  | 0.294404 |
| 11 | 2013 | 53 | -47  | 0.316976 |
| 11 | 2013 | 53 | -46  | 0.258824 |
| 1  | 2014 | 33 | -175 | 11.1     |

5

Supplementary Figures :

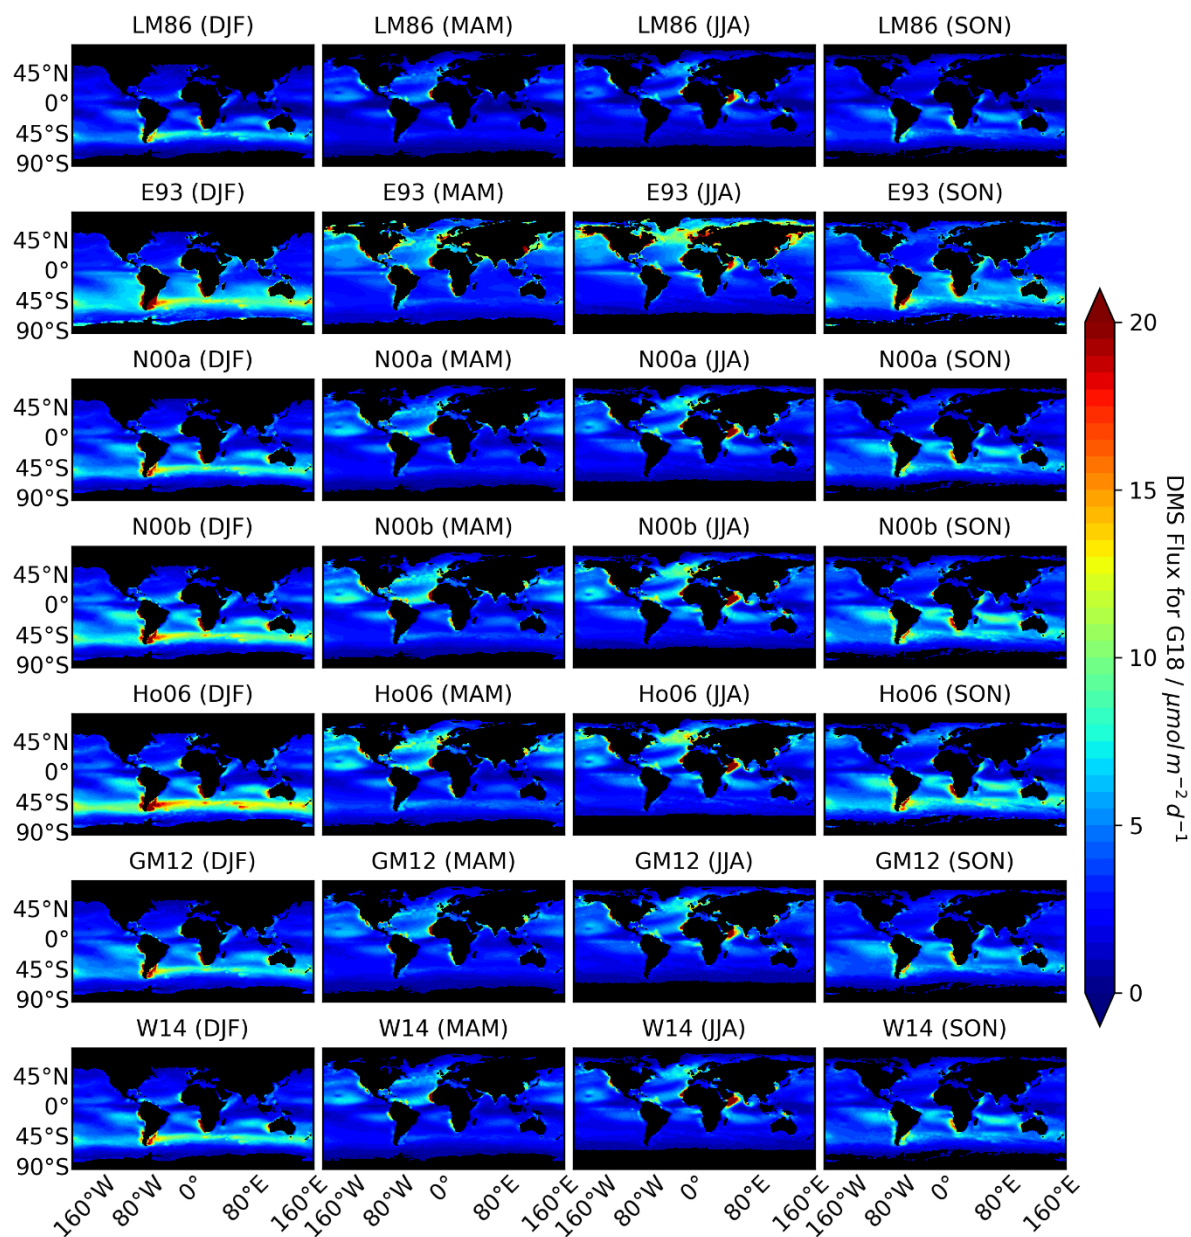

10 **Figure S1:** DMS flux estimation using seven different parameterizations for different seasons using the G18 climatology. In the JJA season, the maximum flux of  $44.75 \mu\text{mol m}^{-2} \text{d}^{-1}$  is observed in Arabian sea near Oman with N00b. In DJF season, the highest value of  $49.34 \mu\text{mol m}^{-2} \text{d}^{-1}$  in the South Atlantic Ocean near coast of Namibia with Ho06 is observed.

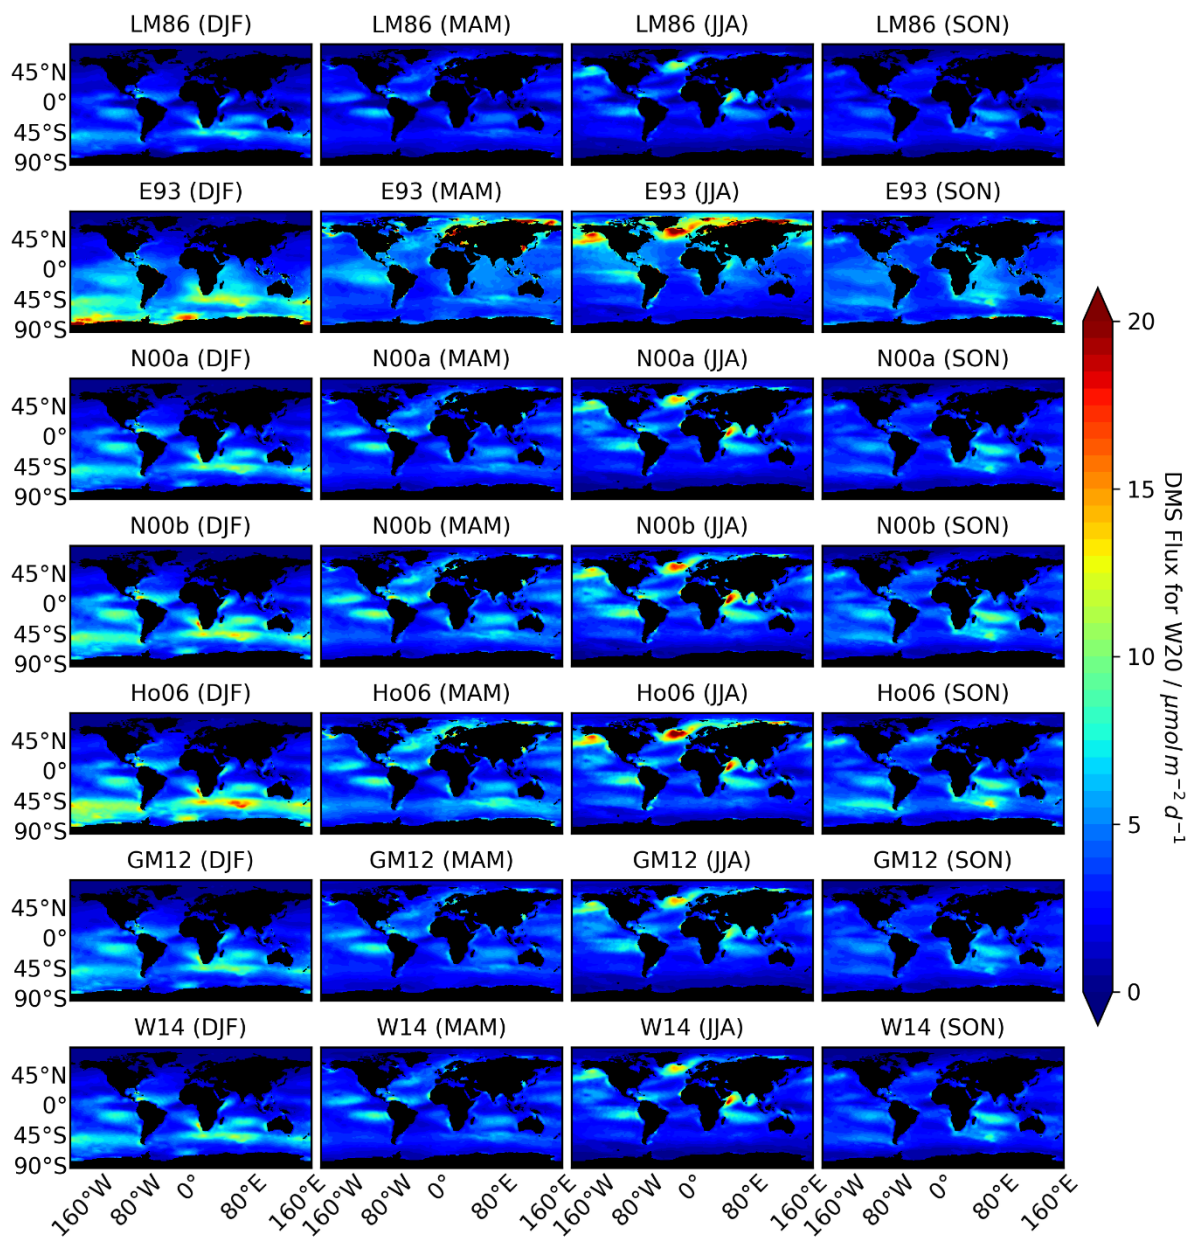

**Figure S2:** DMS flux estimation using seven different parameterizations for different seasons using the W20 climatology. E93 calculates the highest flux value of  $27.86 \mu\text{mol m}^{-2} \text{d}^{-1}$  in the region of Amundsen Sea around the Antarctic coastal region in DJF season while in JJA season it calculated highest flux of  $44.94 \mu\text{mol m}^{-2} \text{d}^{-1}$  in Kara Sea region

15

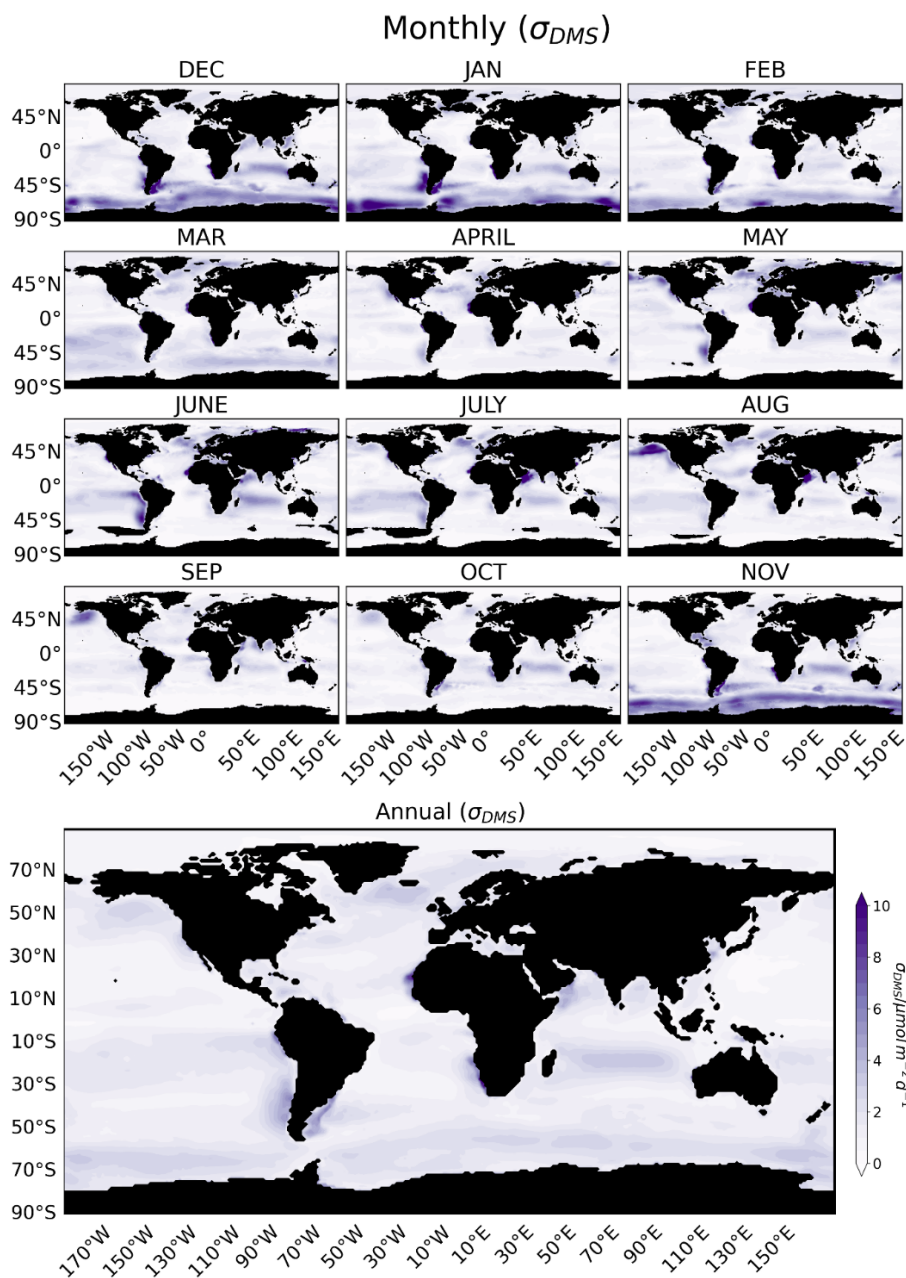

20 **Figure S3:** Standard deviation in DMS flux due to the standard deviation in seawater DMS concentration. In DJF, a maximum deviation of  $34.64 \mu\text{mol m}^{-2} \text{d}^{-1}$  near the coast of Namibia of the South Atlantic Ocean in January is observed. In the MAM season, the maximum deviation of  $20.55 \mu\text{mol m}^{-2} \text{d}^{-1}$  near the Gulf of Kutch in Arabian Sea is observed in May. In the JJA season, it is  $23.87 \mu\text{mol m}^{-2} \text{d}^{-1}$  near the coast of Oman in the Arabian Sea in July. In the SON season, the maximum deviation of  $18.40 \mu\text{mol m}^{-2} \text{d}^{-1}$  near coast of Namibia in South Atlantic Ocean during November is observed. On an annual scale, the maximum deviation obtained is  $11.42 \mu\text{mol m}^{-2} \text{d}^{-1}$  near the coast of Namibia.

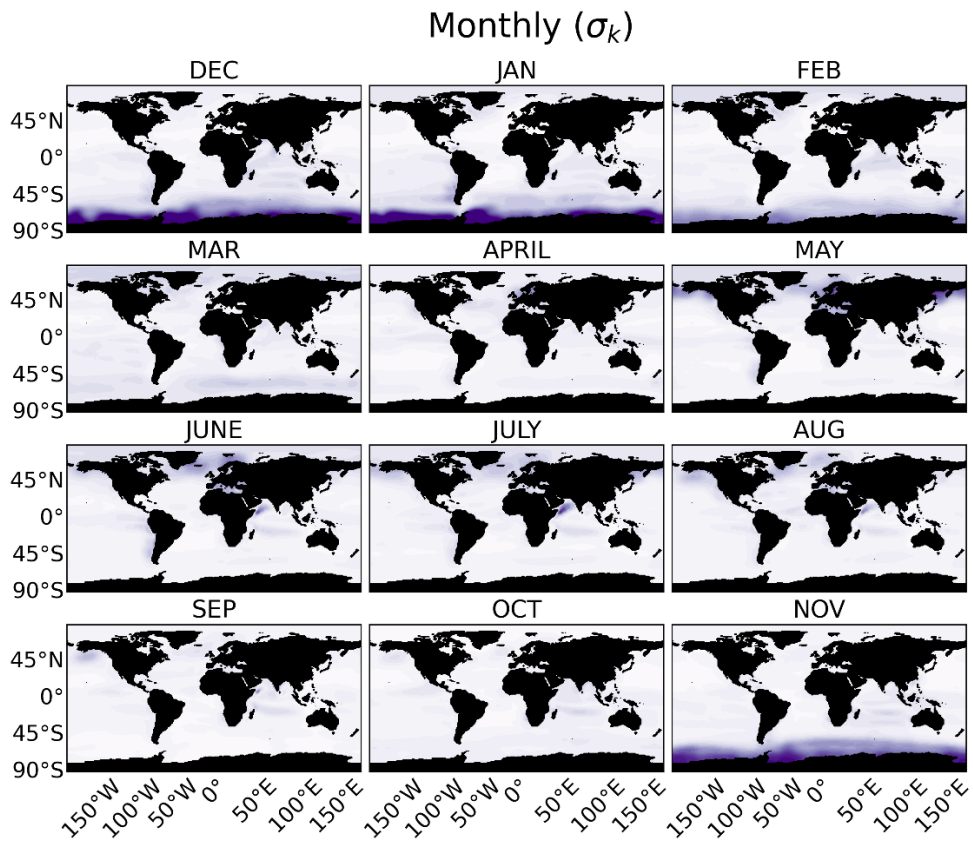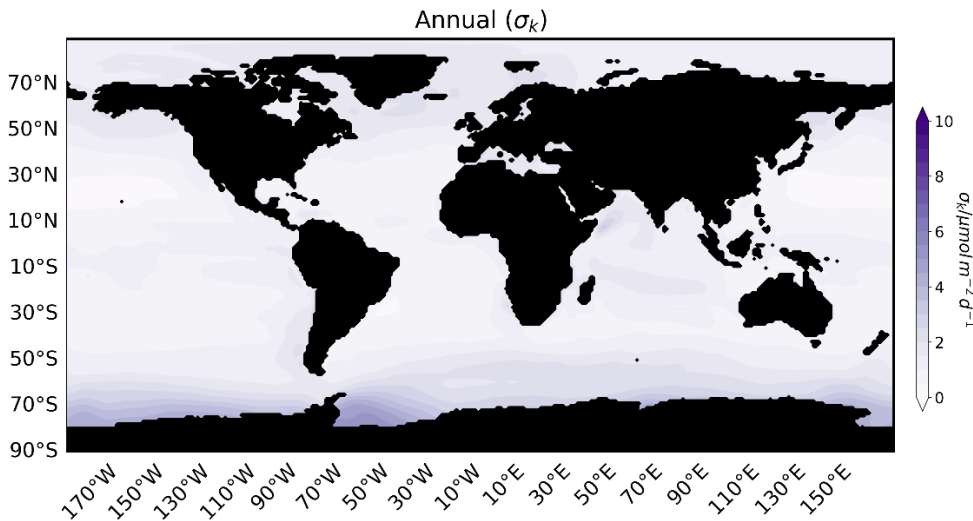

25

**Figure S4:** Standard deviation in DMS flux due to the standard deviation between different flux parameterizations. In DJF, a maximum deviation of  $21.70 \mu\text{mol m}^{-2} \text{d}^{-1}$  near the Atlantic Peninsula in January is observed. In the MAM season, the maximum deviation of  $9.12 \mu\text{mol m}^{-2} \text{d}^{-1}$  is observed in the Gulf of Alaska during May. In the JJA season, the maximum is  $8.86 \mu\text{mol m}^{-2} \text{d}^{-1}$  near the Somali basin, which is observed in July. In the SON season, the maximum deviation of  $10.43 \mu\text{mol m}^{-2} \text{d}^{-1}$  near the Antarctic Peninsula is observed. On an annual scale, the maximum deviation obtained is  $5.35 \mu\text{mol m}^{-2} \text{d}^{-1}$  near the Antarctic Peninsula region.

30



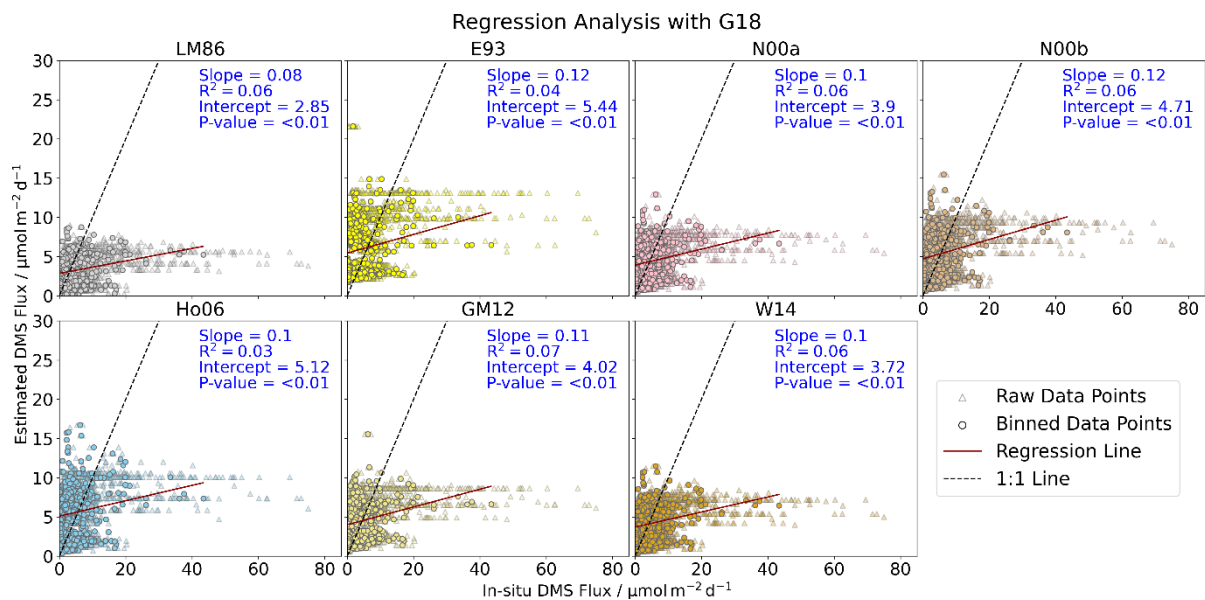

**Figure S5:** The regression between the in situ and estimated DMS fluxes using G18 with the N00b parameterization and the other six parameterizations show that regression with in situ data seems to be poor with  $R^2$  values ranging from 0.03 to 0.07. Dark red line is the regression between binned in situ DMS flux and estimated DMS flux points. Black dash-line is the 1:1 representation between in situ flux points and estimated flux points.

35

40

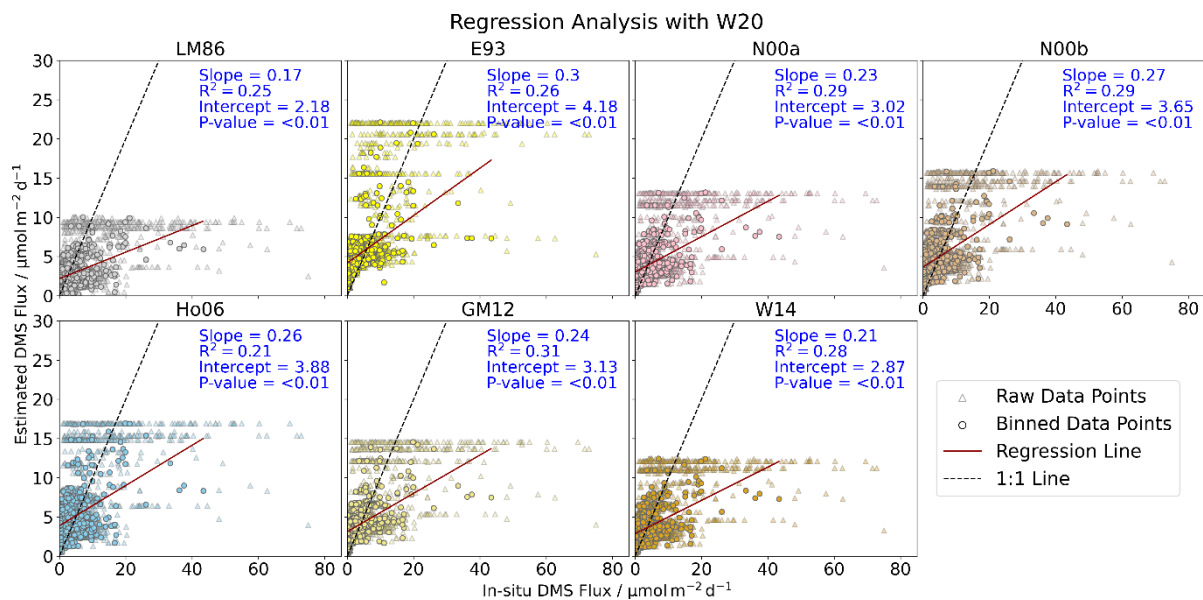

45 **Figure S6:** The regression between the in situ and estimated DMS fluxes using G18 with the N00b parameterization and the other six parameterizations show that regression with in situ data seems to be poor with  $R^2$  values ranging from 0.21 to 0.31. Dark red line is the regression between binned in situ DMS flux and estimated DMS flux points. Black dash-line is the 1:1 representation between in situ flux points and estimated flux points

## References

- 50 Bell, T. G., De Bruyn, W., Marandino, C. A., Miller, S. D., Law, C. S., Smith, M. J., and Saltzman, E. S.: Dimethylsulfide gas transfer coefficients from algal blooms in the Southern Ocean, *Atmos. Chem. Phys.*, 15, 1783–1794, <https://doi.org/10.5194/acp-15-1783-2015>, 2015.
- Blomquist, B. W., Brumer, S. E., Fairall, C. W., Huebert, B. J., Zappa, C. J., Brooks, I. M., Yang, M., Bariteau, L., Prytherch, J., Hare, J. E., Czerski, H., Matei, A., and Pascal, R. W.: Wind Speed and Sea State Dependencies of Air-Sea Gas Transfer: Results From the High Wind Speed Gas Exchange Study (HiWinGS), *J. Geophys. Res. Ocean.*, 122, 8034–8062, <https://doi.org/10.1002/2017JC013181>, 2017.
- Land, P. E., Shutler, J. D., Bell, T. G., and Yang, M.: Exploiting satellite earth observation to quantify current global oceanic DMS flux and its future climate sensitivity, *J. Geophys. Res. Ocean.*, 119, 7725–7740, <https://doi.org/10.1002/2014JC010104>, 2014.
- 60 Leck, C. and Persson, C.: The central Arctic Ocean as a source of dimethyl sulfide Seasonal variability in relation to biological activity, <https://doi.org/10.3402/tellusb.v48i2.15834>, 1996.
- Marandino, C. A., De Bruyn, W. J., Miller, S. D., and Saltzman, E. S.: Eddy correlation measurement of the air/sea flux of

- dimethylsulfide over the North Pacific Ocean, *J. Geophys. Res. Atmos.*, 112, 1–12, <https://doi.org/10.1029/2006JD007293>, 2007.
- 65 Marandino, C. A., De Bruyn, W. J., Miller, S. D., and Saltzman, E. S.: DMS air/sea flux and gas transfer coefficients from the North Atlantic summertime coccolithophore bloom, *Geophys. Res. Lett.*, 35, 1–5, <https://doi.org/10.1029/2008GL036370>, 2008.
- Marandino, C. A., De Bruyn, W. J., Miller, S. D., and Saltzman, E. S.: Open ocean DMS air/sea fluxes over the eastern South Pacific Ocean, *Atmos. Chem. Phys.*, 9, 345–356, <https://doi.org/10.5194/acp-9-345-2009>, 2009.
- 70 Omori, Y., Tanimoto, H., Inomata, S., Ikeda, K., Iwata, T., Kameyama, S., Uematsu, M., Gamo, T., Ogawa, H., and Furuya, K.: Sea-to-air flux of dimethyl sulfide in the South and North Pacific Ocean as measured by proton transfer reaction-mass spectrometry coupled with the gradient flux technique, *J. Geophys. Res.*, 122, 7216–7231, <https://doi.org/10.1002/2017JD026527>, 2017.
- Sharma, S., Barrie, L. A., Plummer, D., McConnell, J. C., Brickell, P. C., Levasseur, M., Gosselin, M., and Bates, T. S.: Flux estimation of oceanic dimethyl sulfide around North America, *J. Geophys. Res. Atmos.*, 104, 21327–21342, <https://doi.org/10.1029/1999JD900207>, 1999.
- Shon, Z. H., Davis, D., Chen, G., Grodzinsky, G., Bandy, A., Thornton, D., Sandholm, S., Bradshaw, J., Stickel, R., Chameides, W., Kok, G., Russell, L., Mauldin, L., Tanner, D., and Eisele, F.: Evaluation of the DMS flux and its conversion to SO<sub>2</sub> over the southern ocean, *Atmos. Environ.*, 35, 159–172, [https://doi.org/10.1016/S1352-2310\(00\)00166-7](https://doi.org/10.1016/S1352-2310(00)00166-7), 2001.
- 80 Smith, M. J., Walker, C. F., Bell, T. G., Harvey, M. J., Saltzman, E. S., and Law, C. S.: Gradient flux measurements of sea-Air DMS transfer during the Surface Ocean Aerosol Production (SOAP) experiment, *Atmos. Chem. Phys.*, 18, 5861–5877, <https://doi.org/10.5194/acp-18-5861-2018>, 2018.
- Yang, M., Blomquist, B. W., Fairall, C. W., Archer, S. D., and Huebert, B. J.: Air-sea exchange of dimethylsulfide in the Southern Ocean: Measurements from so GasEx compared to temperate and tropical regions, *J. Geophys. Res. Ocean.*, 116, 1–
- 85 17, <https://doi.org/10.1029/2010JC006526>, 2011.
